# Supplementary material for: An anthracene based metal–organic framework showing efficient angle-dependent polarized emission, luminescence thermometry, and photoelectronic response
Source: Royal Society of Chemistry journal article supplement (doi:10.1039/d1dt04077d), 2022-01-01
Supplement: d1dt04077d1.pdf [file d1dt04077d1.pdf]

*Electronic Supplementary Information (SI) for*

**Anthracene based metal-organic framework showing efficient angle-dependent polarized emission, luminescent thermometry, and photoelectronic response**

Ji-Rui Zhang,<sup>ab</sup> Hao-Yi Zhang<sup>b</sup>, Jia-hui Guo<sup>b</sup>, Zi-Han Liu<sup>b</sup>, Cheng-Yu Ma<sup>b</sup>, Xiao-Gang Yang,<sup>\*b</sup> Xiao-Yan Lu,<sup>b</sup> Jian-Hua Qin,<sup>b</sup> and Lu-Fang Ma<sup>\*ab</sup>

<sup>a</sup>College of Chemistry, Zhengzhou University, Zhengzhou 450001, P. R. China.

<sup>b</sup>College of Chemistry and Chemical Engineering, Luoyang Normal University, Henan Key Laboratory of Function-Oriented Porous Materials, Luoyang 471934, P. R. China.

\*Corresponding author

Tel.: 86-379-68618328, Fax: 86-20-68618320.

E-mail: mazhuxp@126.com; yxg2233@126.com

## 1. Materials and general methods

All reagents were bought from commercial sources and used without any further purification. Power X-ray diffraction (PXRD) data was obtained using a Bruker D8-ADVANCE X-ray diffractometer with copper target ( $\lambda = 1.5418 \text{ \AA}$ ) in a  $2\theta$  range from  $5$  to  $50^\circ$  at room temperature. The simulated PXRD data was calculated using Mercury 1.4.2 software based on single-crystal structures of **1**. Thermo gravimetric analysis (TGA) test was carried out on a SII EXSTAR6000 TG/DTA6300 thermal analysis system, ranging from room temperature to  $800 \text{ }^\circ\text{C}$  under a nitrogen atmosphere at a ramping rate of  $10 \text{ }^\circ\text{C}/\text{min}$ . FT-IR spectra was measured from  $4000$ - $400 \text{ cm}^{-1}$  by employing the KBr pellet method. UV-Vis absorption spectra was recorded on S-3TECHCOMP spectrophotometer with a slit of  $6 \text{ nm}$ . Fluorescence spectra, fluorescence decay curve, temperature- and angle-dependent fluorescence emission were conducted on an Edinburgh FLS1000 fluorescence spectrometer by the crystal powders of the title MOF. The temperature-dependent fluorescence emission were conducted on a temperature controller attached to a cryostat (Oxford Ltd. Optistat DN2) on above fluorescence spectrometer. The angle-dependent fluorescence spectra were recorded by rotating a circular polarizer with scale from  $0$  to  $330^\circ$ . The polarizer was placed between the detector and the sample. The morphology of the MOF powders was investigated by using a field emission scanning electron microscope (SEM Sigma 500).

Optoelectronic properties tests were conducted by a CHI 660E electrochemical workstation. Using **1**-modified indium tin oxide (ITO) electrode with a working area

of 1.0 cm<sup>2</sup> as working electrodes, Ag/AgCl and platinum wire as reference and counter electrodes and 0.5 M Na<sub>2</sub>SO<sub>4</sub> solution as the electrolyte. The three-electrode system was conducted in a quartz glass reactor ca. 50 cm<sup>3</sup> and irradiated by a 300 W xenon lamp. The cyclic voltammograms (CV) was performed with a scan rate of 50 mV/s. Transient photocurrent responses were tested through the on-off illumination at room temperature. Electrochemical impedance spectroscopy (EIS) Nyquist plots was obtained at the potential of 0 V and -0.5 V potential in three-electrode system. The relationship between current density and excitation wavelength was recorded by using RPEC-D Photoelectrochemical Analyzer (Xi'an Remex Analyse Instrument Co., Ltd., Xi'an, China). The monochromatic light was produced from a 300 W Xe arc lamp equipped with a Omni-λ150 monochromator.

## **2. Syntheses of [Cd(DCPA)(DMF)]·(H<sub>2</sub>O) (1)**

A mixture of 9,10-di(p-carboxyphenyl)anthracene (H<sub>2</sub>DCPA, 0.1 mmol, 41.8 mg), Cd(NO<sub>3</sub>)<sub>2</sub>·9H<sub>2</sub>O (0.2 mmol, 80.0 mg), DMF (6 mL) and 60 μl of 68% HNO<sub>3</sub> were put in a 20 mL Pyrex vial, keeping the temperature at 100 °C for 48 h to yield yellow block crystals after a natural cooling process to room temperature. Then, the resulting mixture was isolated, washed several times with DMF and dried in air. IR (KBr pellet, cm<sup>-1</sup>): 3430 m, 3070 w, 1647 s, 1579 s, 1531 s, 1384 s, 1275 w, 1179 m, 1010 w, 946 m, 855 m, 763 s, 706 s, 666 s, 493 m.

## **3. X-ray single crystal structure**

Single-crystal X-ray diffraction data were gathered at room temperature (293 K) on an Oxford Diffraction SuperNova area-detector diffractometer equipped with Mo-Kα X-

ray source ( $\lambda = 0.71073 \text{ \AA}$ ). The data reduction was treated by using CrysAlis Pro software.<sup>1</sup> The crystal structure was solved by SHELXS-2014 program.<sup>2</sup> Crystallographic data of **1** was listed in Table S1. The CIF file of **1** (CCDC No. 2124068) can be gained free of charge via <http://www.ccdc.cam.ac.uk/conts/retrieving.html>.

#### **4. Electronic structure calculations**

The density functional theory (DFT) calculations were studied by Dmol3 in Material Studio software package.<sup>3,4</sup> The initial configuration was completely improved by Perdew-Wang (PW91) generalized gradient approximation (GGA) way with the double numerical basis sets plus polarization function (DNP).<sup>5</sup> The core electrons for metals were dealt with effective core potentials (ECP).

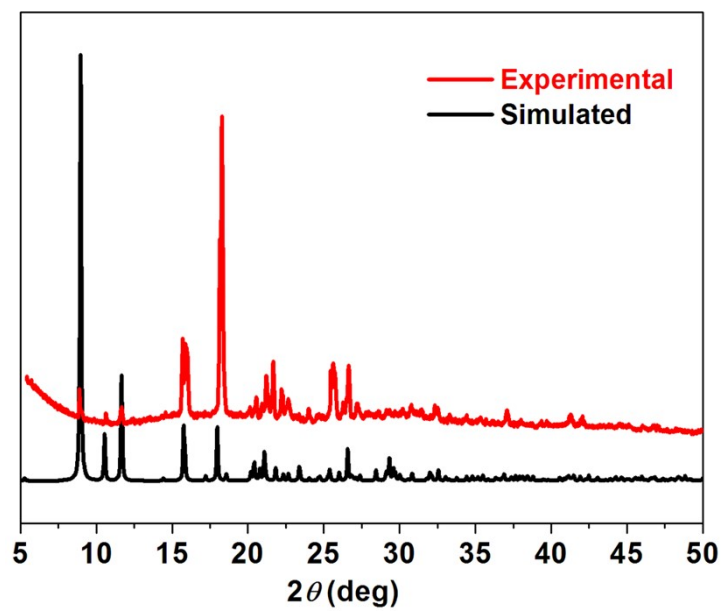

Figure S1. PXRD patterns of 1.

**Table S1.** Crystallographic data for **1**.

| <b>Sample</b>                                                    | <b>[Cd(DCPA)(DMF)]·(H<sub>2</sub>O) (1)</b>       |
|------------------------------------------------------------------|---------------------------------------------------|
| Chemical formula                                                 | C <sub>31</sub> H <sub>25</sub> NCdO <sub>6</sub> |
| Formula weight                                                   | 619.92                                            |
| Crystal system                                                   | Monoclinic                                        |
| Space group                                                      | <i>I</i> 2/ <i>a</i>                              |
| <i>a</i> (Å)                                                     | 7.6683(6)                                         |
| <i>b</i> (Å)                                                     | 10.3179(13)                                       |
| <i>c</i> (Å)                                                     | 33.709(2)                                         |
| <i>α</i> (°)                                                     | 90.00                                             |
| <i>β</i> (°)                                                     | 95.667(7)                                         |
| <i>γ</i> (°)                                                     | 90.00                                             |
| <i>V</i> (Å <sup>3</sup> )                                       | 2654.0(4)                                         |
| <i>Z</i>                                                         | 4                                                 |
| <i>D</i> (g cm <sup>-3</sup> )                                   | 1.551                                             |
| <i>μ</i> (mm <sup>-1</sup> )                                     | 0.869                                             |
| <i>R</i> <sub>int</sub>                                          | 0.0615                                            |
| Goof                                                             | 1.061                                             |
| <i>R</i> <sub>1</sub> <sup>a</sup> ( <i>I</i> > 2σ( <i>I</i> ))  | 0.0674                                            |
| <i>wR</i> <sub>2</sub> <sup>b</sup> ( <i>I</i> > 2σ( <i>I</i> )) | 0.1257                                            |

<sup>a</sup>  $R_1 = \Sigma(|F_o| - |F_c|)/\Sigma|F_o|$ ; <sup>b</sup>  $wR_2 = [\Sigma w(|F_o|^2 - |F_c|^2)^2/\Sigma w(F_o^2)^2]^{1/2}$

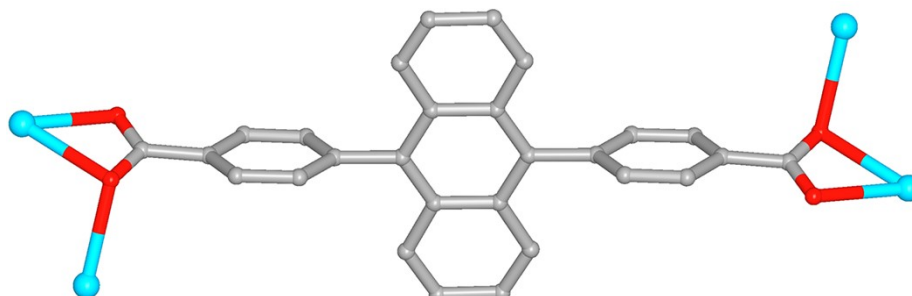

**Figure S2.** View of the coordination mode of DCPA in **1**.

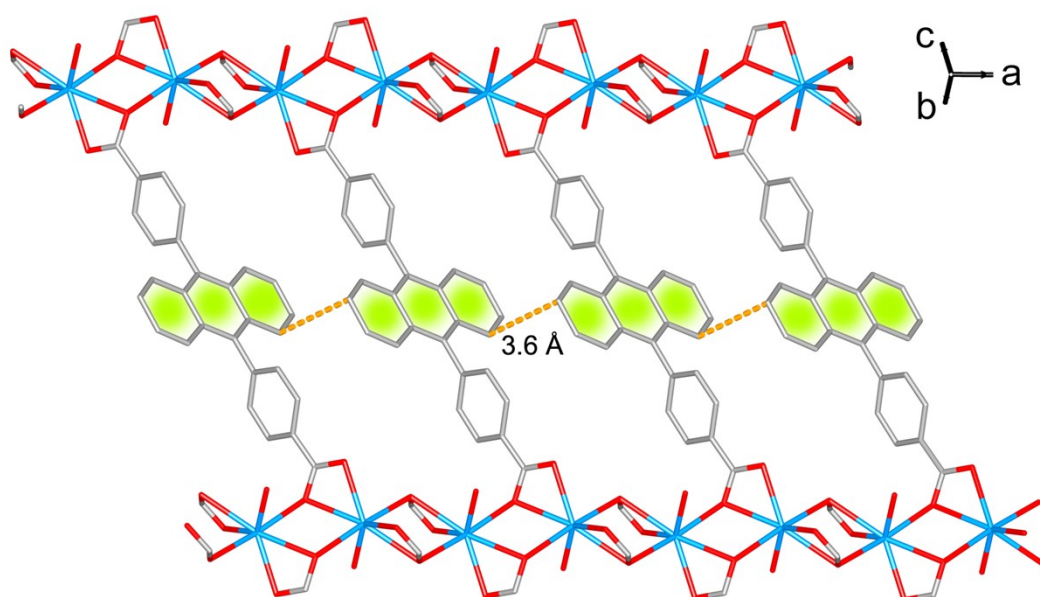

**Figure S3.** View of the parallel stacking of anthracene cores with the inter-plan distance of 3.6 Å arrange in **1**.

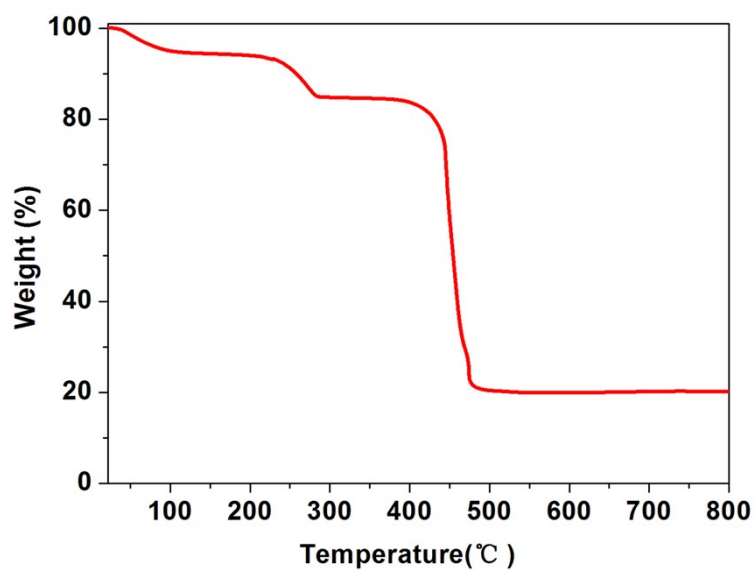

(a)

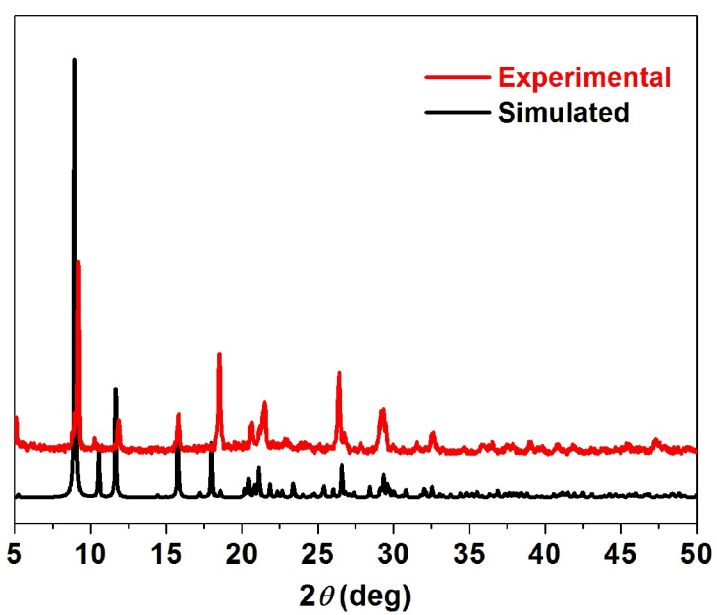

(b)

**Figure S4.** (a) Thermo gravimetric analysis (TGA) curve of **1**. (b) PXRD patterns of **1** after heating at 400 °C.



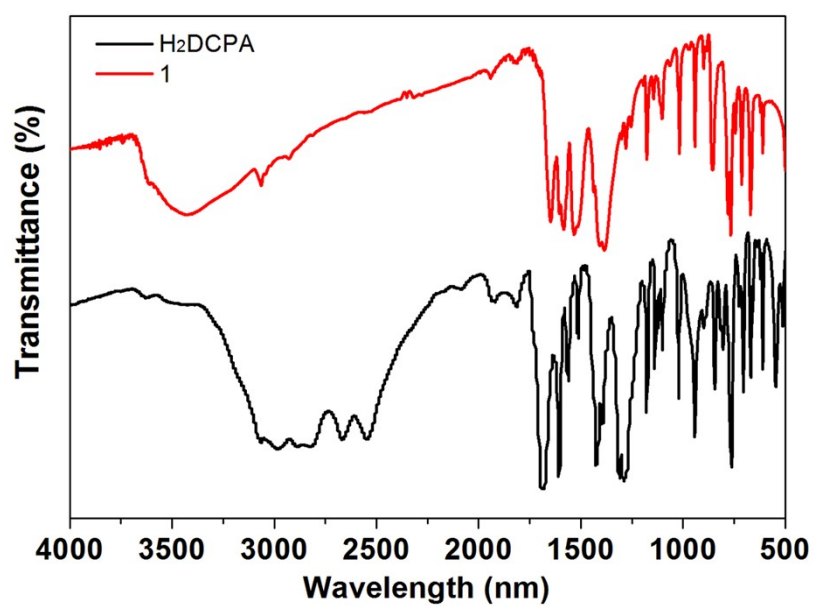

**Figure S5.** FT-IR spectra of free H<sub>2</sub>DCPA ligand and **1**.

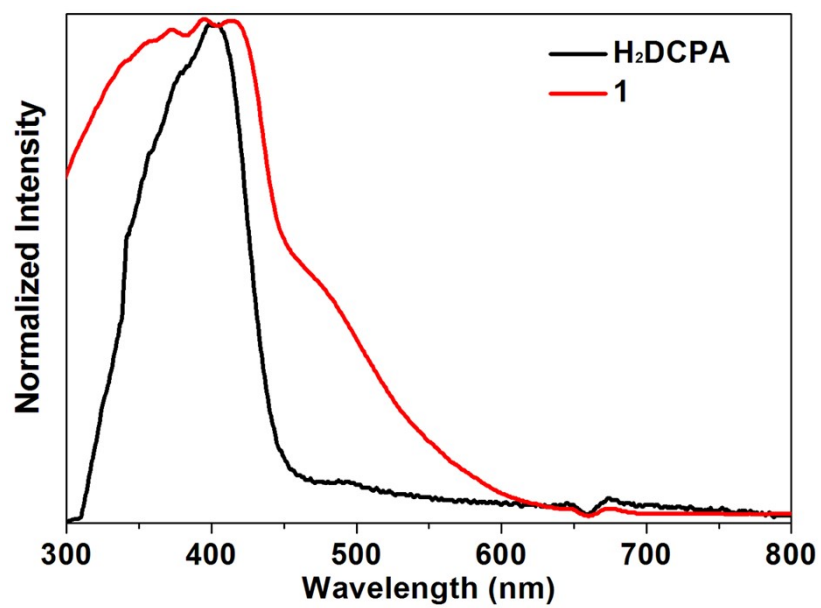

**Figure S6.** The UV-vis absorption curves of free H<sub>2</sub>DCPA and **1** in solid state.

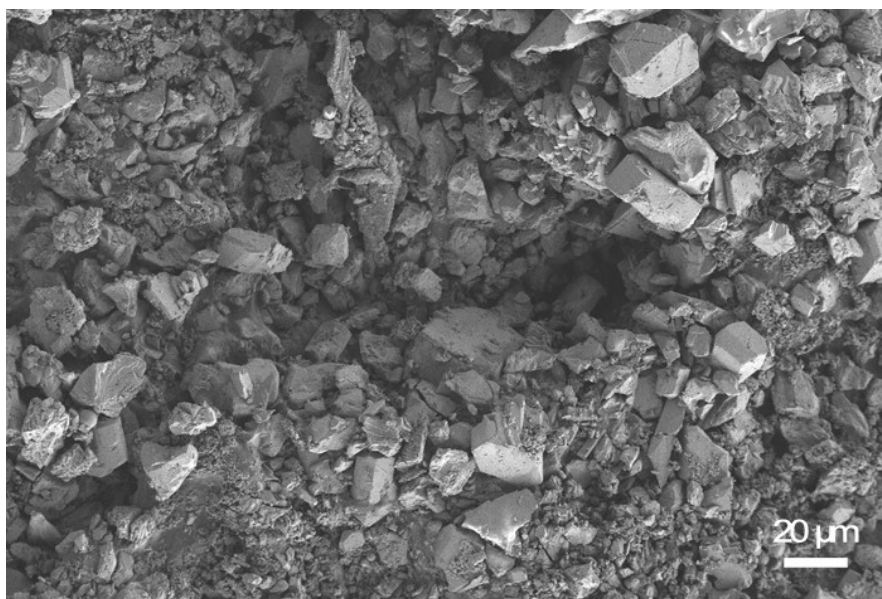

**Figure S7.** The SEM image of the powder of **1**.

**Table S2.** CIE-1931 chromaticity diagram for the temperature-dependent fluorescent emission

| Temperature (K) | CIE (x,y)     | Emission peak (nm) |
|-----------------|---------------|--------------------|
| 73              | 0.1806,0.2191 | 459                |
| 93              | 0.1829,0.2310 | 462                |
| 113             | 0.1849,0.2412 | 465                |
| 133             | 0.1866,0.2498 | 467                |
| 153             | 0.1891,0.2614 | 471                |
| 173             | 0.1916,0.2716 | 473                |
| 193             | 0.1947,0.2840 | 477                |
| 213             | 0.1984,0.2972 | 479                |
| 233             | 0.2018,0.3080 | 482                |
| 253             | 0.2063,0.3182 | 485                |
| 273             | 0.2103,0.3262 | 487                |
| 293             | 0.2132,0.3331 | 490                |

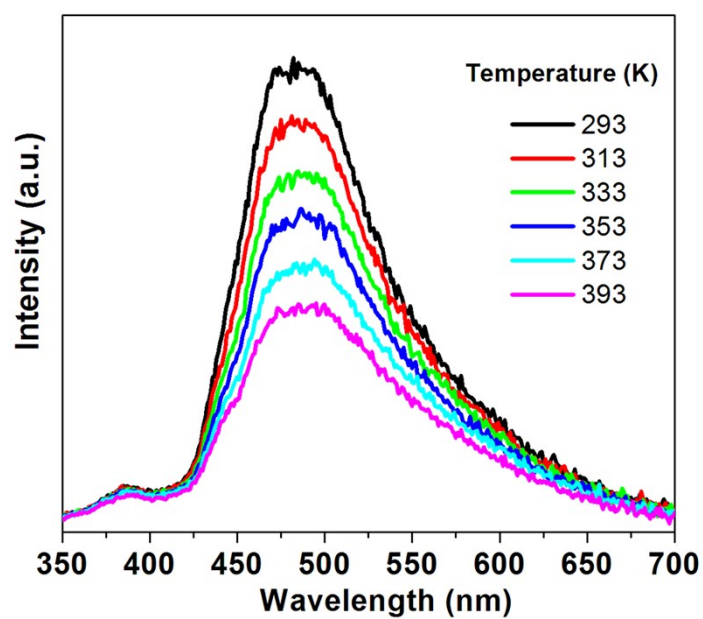

(a)

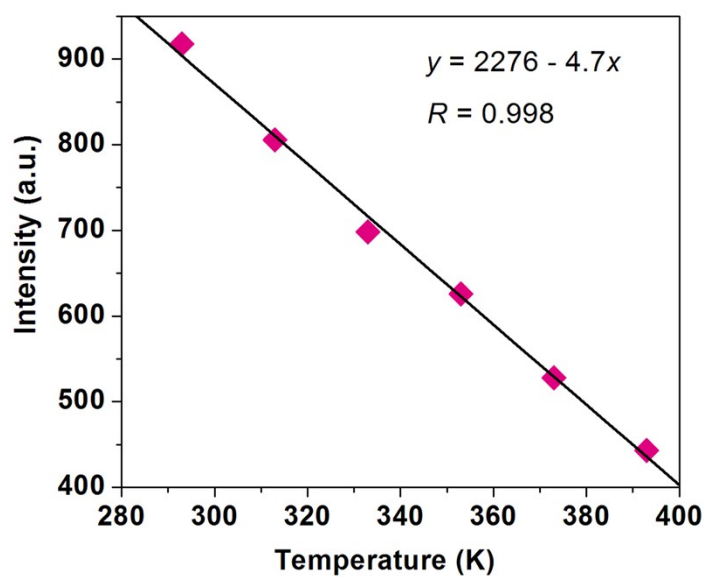

(b)

**Figure S8.** (a) Fluorescence spectra of **1** recorded in the temperature range of 293-393 K excited at 330 nm. (b) Temperature-dependent maximum fluorescence intensity and fitted curve in the temperature range of 293-393 K.

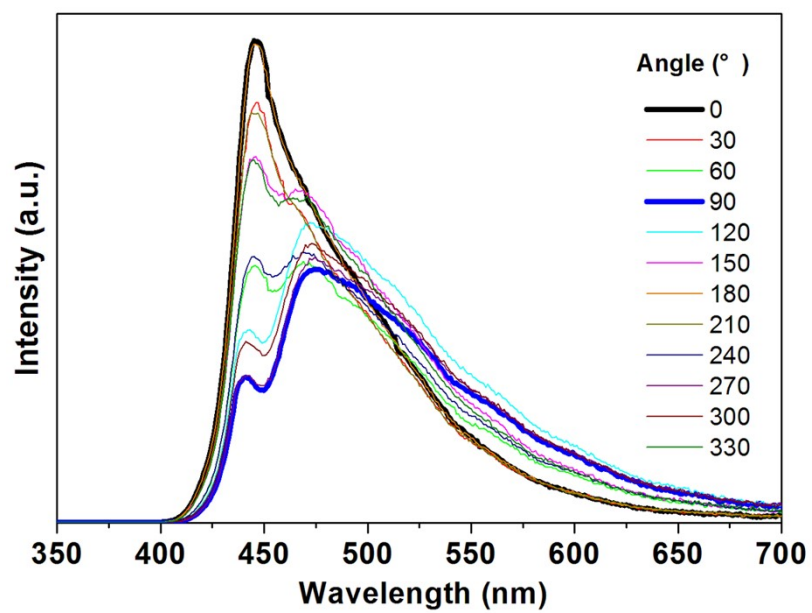

**Figure S9.** Angle-dependent polarized fluorescence spectra of **1** measured from 0 to 330°.

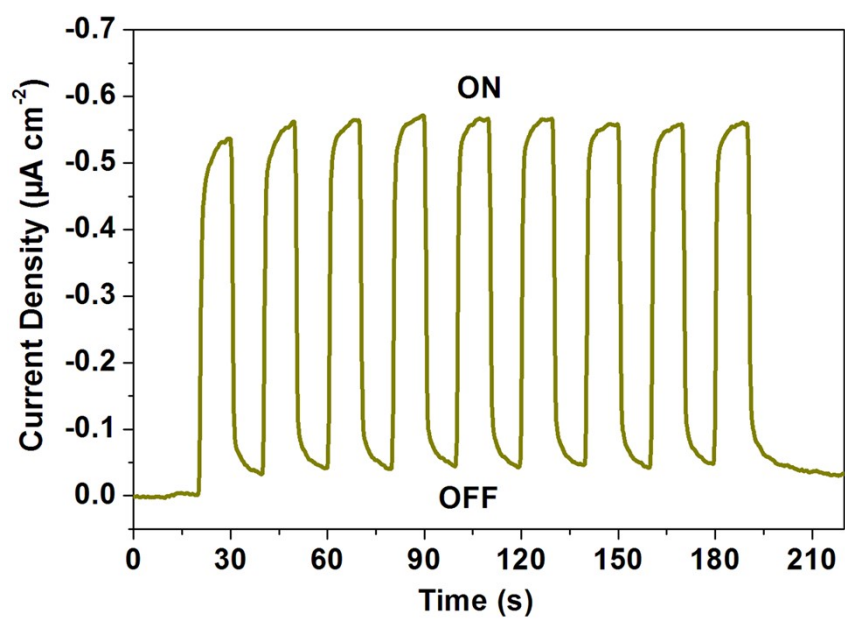

(a)

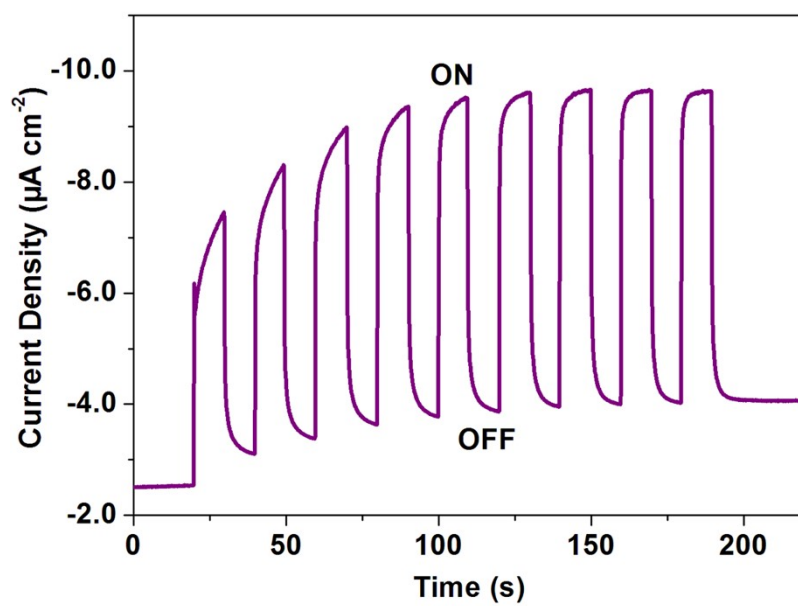

(b)

**Figure S10.** Transient current density–time curves of **1** measured under the bias potential of 0 (a) and -0.5 V (b).

## Supporting References

1. CrysAlisPro, Rigaku Oxford Diffraction, Version 1.171.39.6a.
2. G. M. Sheldrick, *Acta Crystallogr. Sect. A* 2008, **64**, 112.
3. (a) B. Delley, *J. Chem. Phys.* 1990, **92**, 508; (b) B. Delley, *J. Chem. Phys.* 2000, **113**, 7756.
4. Dmol3 Module, MS Modeling, Version 2.2; Accelrys Inc.: San, Diego, 2003.
5. J. P. Perdew, J. A. Chevary, S. H. Vosko, K. A. Jackson, M. R. Pederson, D. J. Singh and C. Fiolhais, *Phys. Rev. B* 1992, **46**, 6671.
